# Supplementary material for: A low-cost and advanced SiOx–C composite with hierarchical structure as an anode material for lithium-ion batteries
Source: Royal Society of Chemistry journal article supplement (doi:10.1039/c5cp01212k), 2015-01-01
Supplement: c5cp01212k1.pdf [file c5cp01212k1.pdf]

Electronic Supplementary Information (ESI)

**A low-cost and advanced SiO<sub>x</sub>/C composite with hierarchical structure as anode material for lithium-ion batteries**

Wenjun Wu,<sup>a</sup> Jing Shi,<sup>a</sup> Yunhui Liang,<sup>a</sup> Fang Liu,<sup>a</sup> Yi Peng<sup>a</sup> and Huabin Yang<sup>\*a</sup>

*Institute of New Energy Material Chemistry, Tianjin Key Laboratory of Metal and Molecule Based Material Chemistry, Collaborative Innovation Center of Chemical Science and Engineering, Nankai University, Tianjin 300071, China.*

*Email: hb\_yang@nankai.edu.cn; Fax: +86-22-23502604. Tel: +86-22-23508405.*

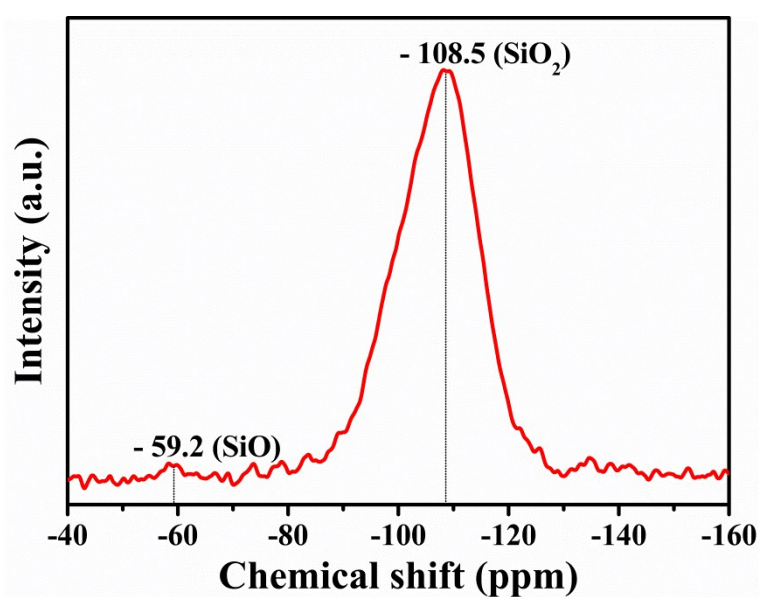

Fig. S1 The <sup>29</sup>Si-NMR spectrum for the SiO<sub>x</sub>/C composite.

**Table S1** The element analysis of EDS for the SiO<sub>x</sub>/C composite.

| Element | Weight percent (%) | Atomic percent (%) |
|---------|--------------------|--------------------|
| C       | 66.4               | 76.7               |
| O       | 17.9               | 15.5               |
| Si      | 15.7               | 7.8                |

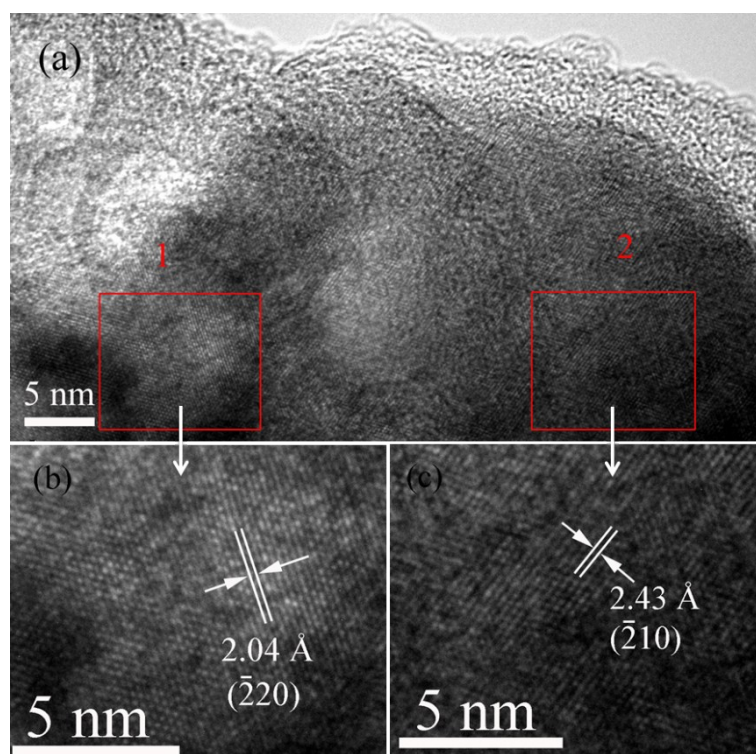

**Fig. S2** HRTEM image of the  $\text{SiO}_x/\text{C}$  composite after discharging to 0.01 V; magnified HRTEM image of (b) region 1 and (c) region 2.

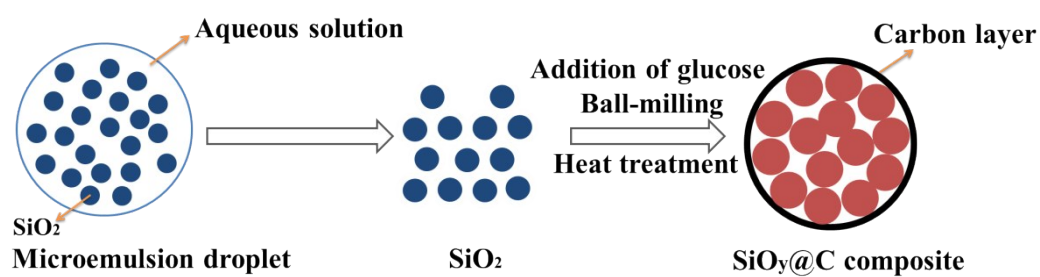

**Fig. S3** Schematic of the preparation process for  $\text{SiO}_y@\text{C}$  composite.

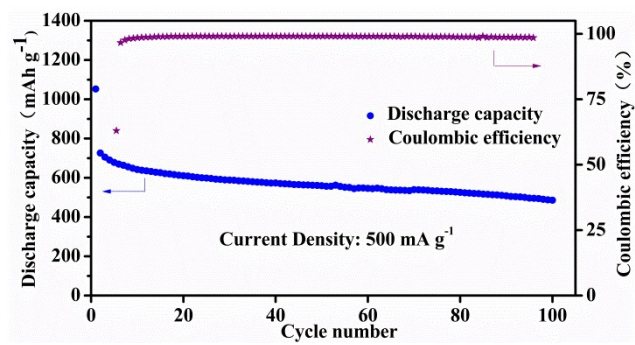

**Fig. S4** Cycling test of the SiO<sub>x</sub>/C electrode at the current density of 500 mA g<sup>-1</sup>.
